# Supplementary material for: Dynamic Immune Response to Vibriosis in Pacific Oyster Crassostrea gigas Larvae during the Infection Process as Supported by Accurate Positioning of GFP-Tagged Vibrio Strains
Source: MDPI journal article supplement (doi:10.3390/microorganisms9071523), 2021-07-17

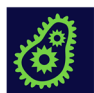

# Dynamic Immune Response to Vibriosis in Pacific Oyster *Crassostrea gigas* Larvae during the Infection Process as Supported by Accurate Positioning of GFP-tagged *Vibrio* Strains

Dongdong Wang <sup>1,\*</sup>, Alfredo Loo <sup>1</sup>, Lobke De Bels <sup>2</sup>, Gilbert Van Stappen <sup>1</sup>, Wim Van den Broeck <sup>2</sup> and Nancy Nevejan <sup>1</sup>

<sup>1</sup> Laboratory of Aquaculture & *Artemia* Reference Center, Department of Animal Sciences and Aquatic Ecology, Faculty of Bioscience Engineering, Ghent University, 9000 Ghent, Belgium

<sup>2</sup> Department of Morphology, Faculty of Veterinary Medicine, Ghent University, Salisburylaan 133, 9820 Merelbeke, Belgium

## \* Correspondence:

Dongdong Wang

Tel.: +32 476272489;

Fax: +32 476272489;

e-mail: dongdong.wang@ugent.be (D.D. Wang); dongdongwangqd@163.com

**Figure S1.** The stable toxicities of *V. splendidus* ME9-GFP (A) and *V. anguillarum* NB10-GFP (B) ( $10^6$  CFU mL<sup>-1</sup>) in experiment 1-4 on *C. gigas* larvae over 96 h exposure. Data are expressed as mean  $\pm$  S.E (n=3). Values at each time point that are marked with a different letter are significantly different ( $P < 0.05$ , two-way repeated measures ANOVA).

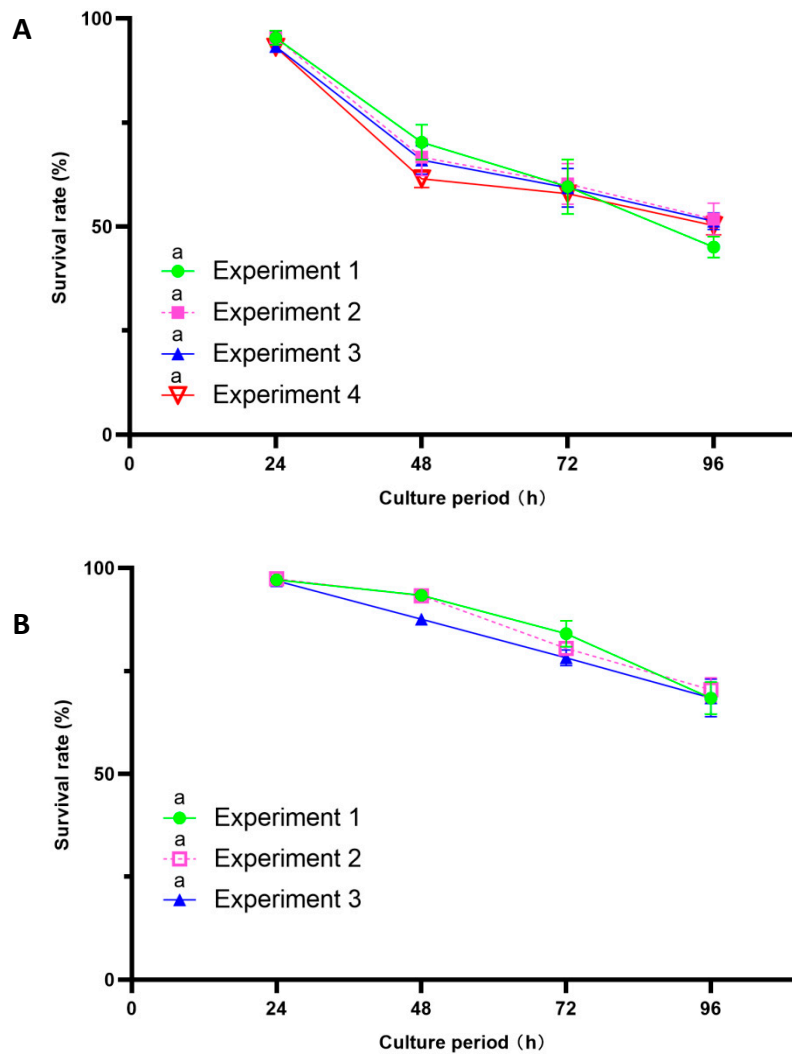

Supplement: s1 [file s1]
